# Supplementary material for: Synthesis of porphyrin(2.1.2.1) Pd(ii) complexes embedded with various π units and their singlet oxygen generation capacity
Source: Royal Society of Chemistry journal article supplement (doi:10.1039/d4dt01749h), 2024-01-01
Supplement: d4dt01749h1.pdf [file d4dt01749h1.pdf]

*Electronic Supplementary Information*

**Synthesis of Porphyrin(2.1.2.1) Pd(II) Complexes Embedded  
with Various  $\pi$  Units and Their Singlet Oxygen Generation  
Capacity**

Xiaojuan Lv,<sup>a</sup> Feng Chen,<sup>\*a</sup> Mingbo Zhou,<sup>b</sup> Tao Zhang,<sup>a</sup> Fengxian Qiu,<sup>a</sup> Songlin Xue<sup>\*a,b</sup>

*Dedicated to Prof. Karl M. Kadish on the occasion of his 80th birthday*

<sup>a</sup> School of Chemistry and Chemical Engineering, Jiangsu University, 301 Xuefu Road, Zhenjiang 212013, China

<sup>b</sup> Key Laboratory of the Assembly and Application of Organic Functional Molecules of Hunan Province, Hunan Normal University, Changsha, Hunan 410081, China.

Corresponding author:

\*E-mail: fengjchen@ujs.edu.cn (F. C); slxue@ujs.edu.cn (SL. X)

## **Table of Contents**

- 1, Supporting Figures
- 2, Cartesian Coordinates

## 1, Supporting Figures

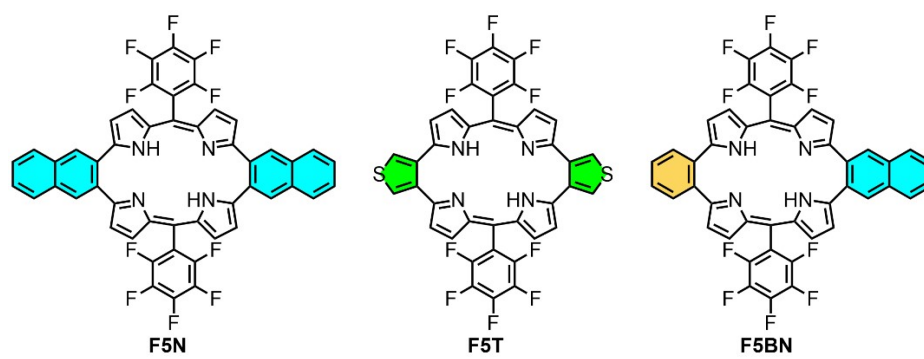

**Figure S1.** Molecular structure of **F5N**, **F5T** and **F5BN**.

Monoisotopic Mass, Even Electron Ions  
 2154 formula(e) evaluated with 1 results within limits (up to 50 best isotopic matches for each mass)  
 Elements Used:  
 C: 50-50 H: 20-20 N: 0-100 O: 0-100 F: 10-10 Na: 0-1 Pd: 1-1

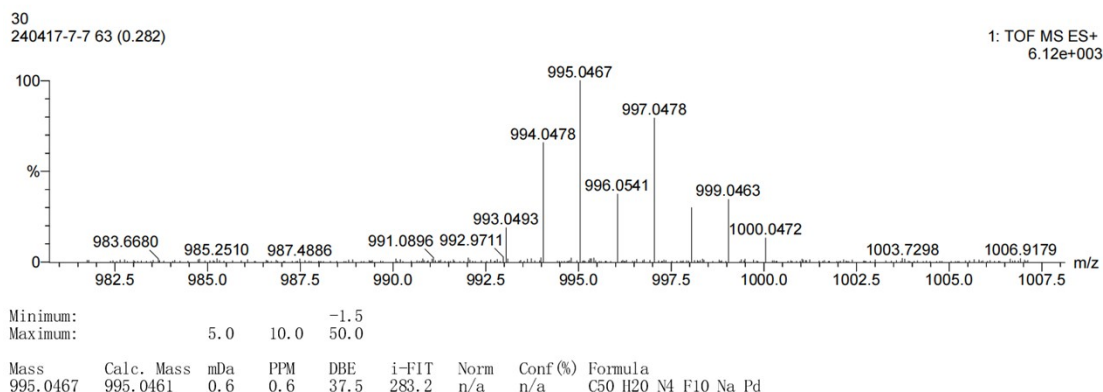

**Figure S2.** HR-ESI-MS spectrum of **F5NPd**.

Monoisotopic Mass, Even Electron Ions  
 1853 formula(e) evaluated with 1 results within limits (up to 50 best isotopic matches for each mass)  
 Elements Used:  
 C: 46-46 H: 18-18 N: 0-100 O: 0-100 F: 10-10 Na: 0-1 Pd: 1-1

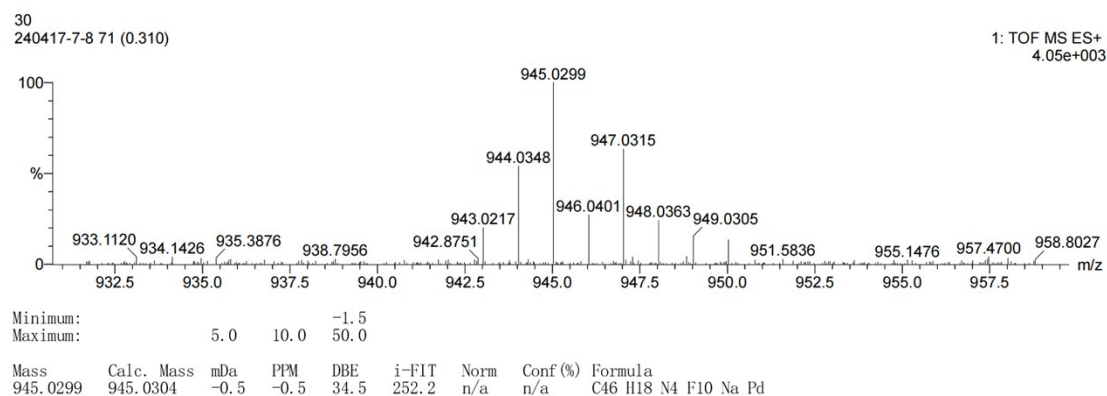

**Figure S3.** HR-ESI-MS spectrum of **F5BNPd**.

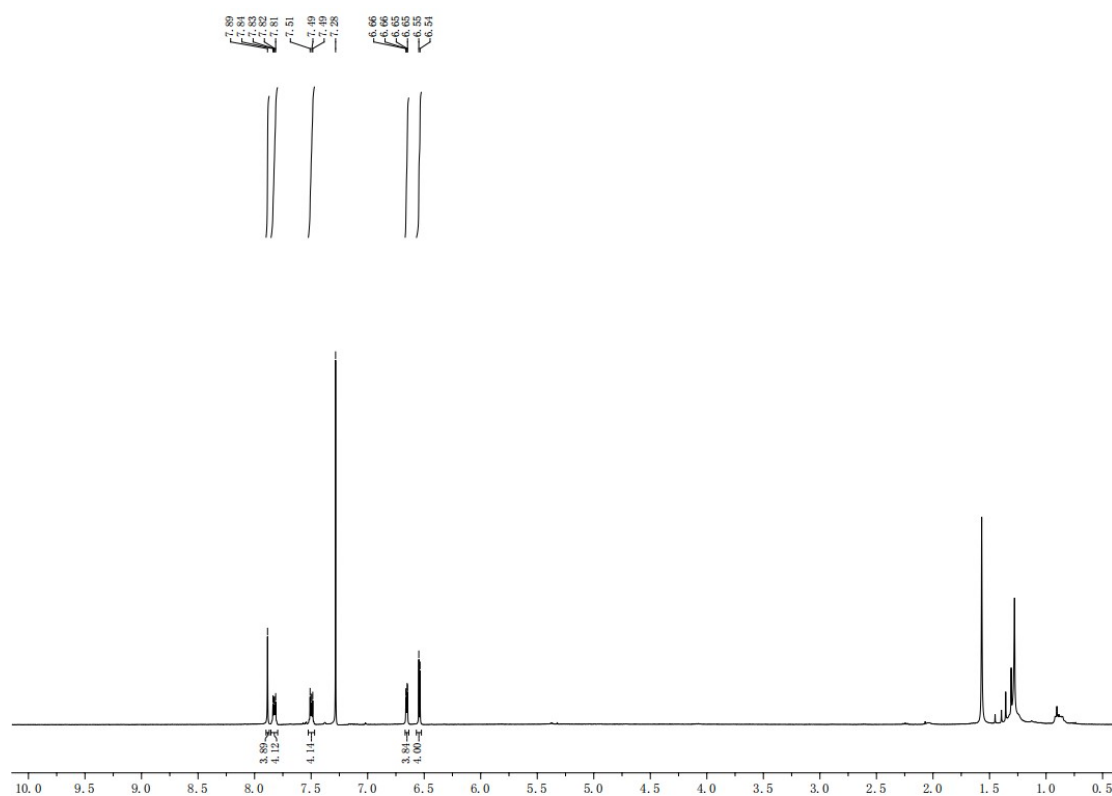

**Figure S4.**  $^1\text{H}$  NMR spectrum of **F5NPd** recorded at 298 K in  $\text{CDCl}_3$ .

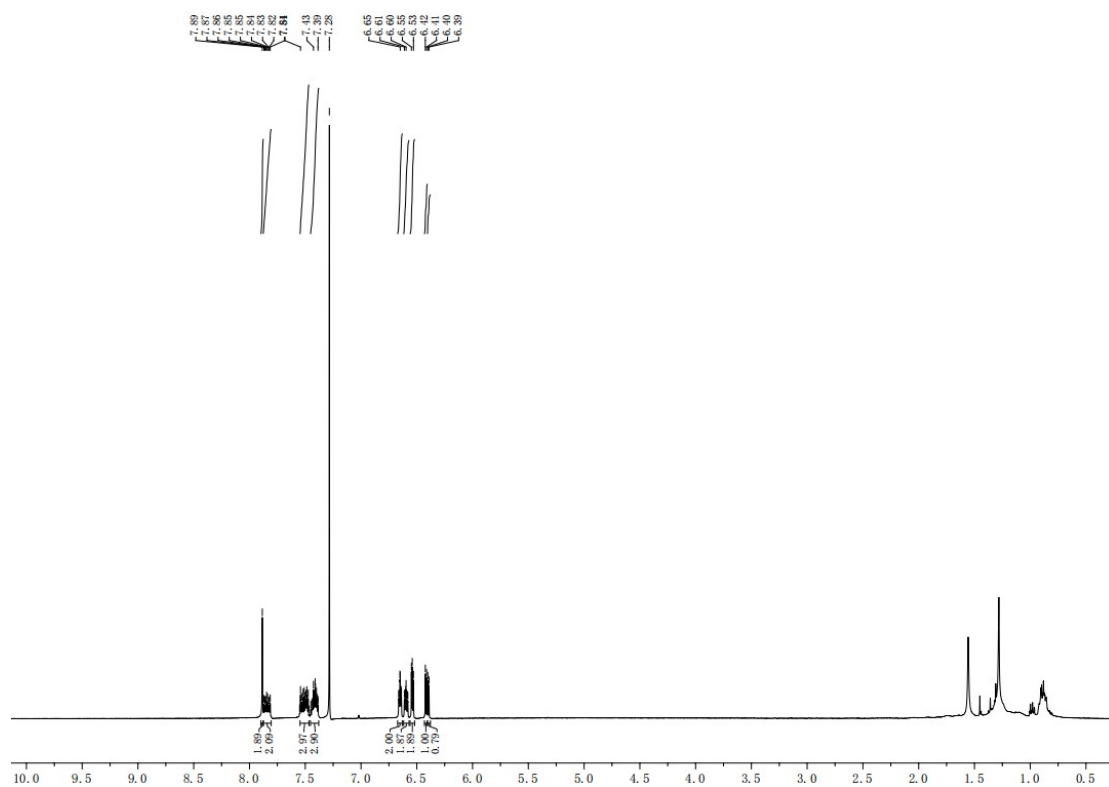

**Figure S5.**  $^1\text{H}$  NMR spectrum of F5BNPd recorded at 298 K in  $\text{CDCl}_3$ .

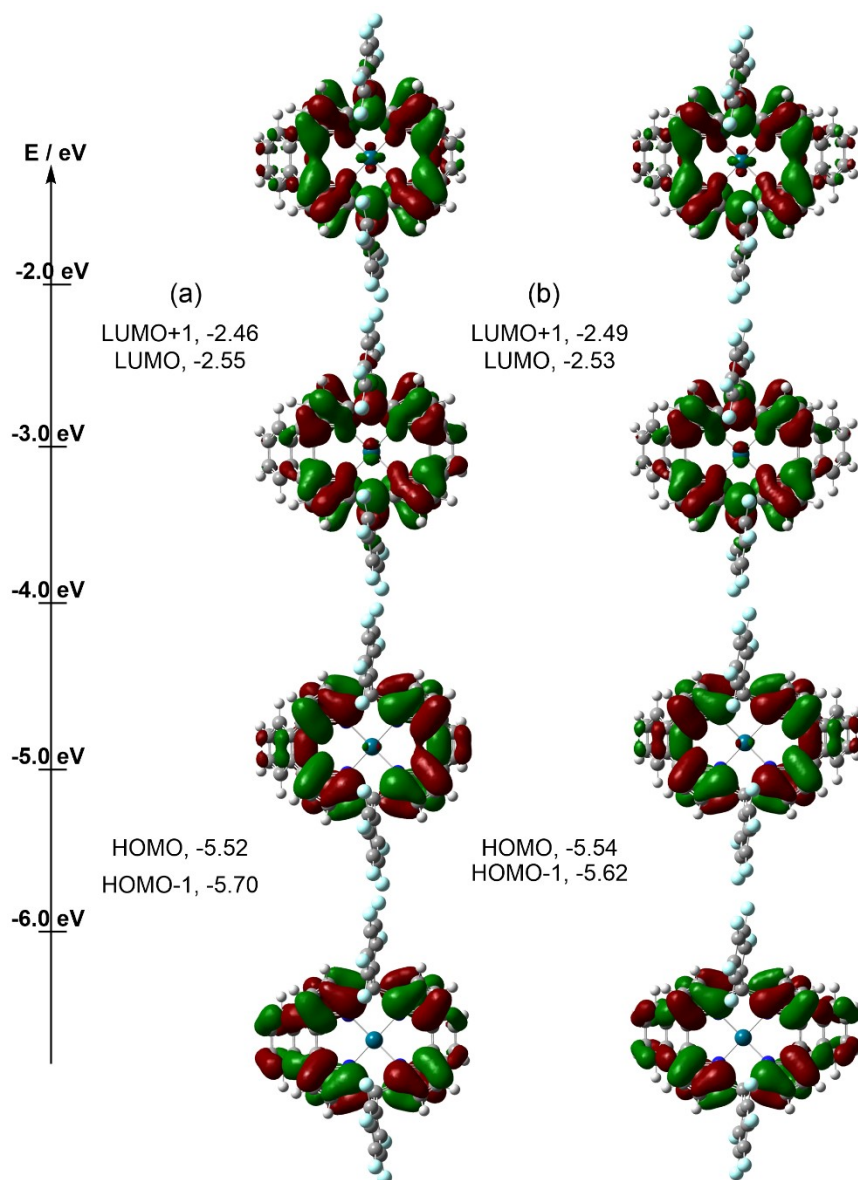

**Figure S6.** Frontier molecular orbital and energy levels of (a-b) **F5BNPd** and **F5NPd** calculated at the B3LYP/6-31G(d, p) (C, N, H, F) + SDD (Pd) basis set.

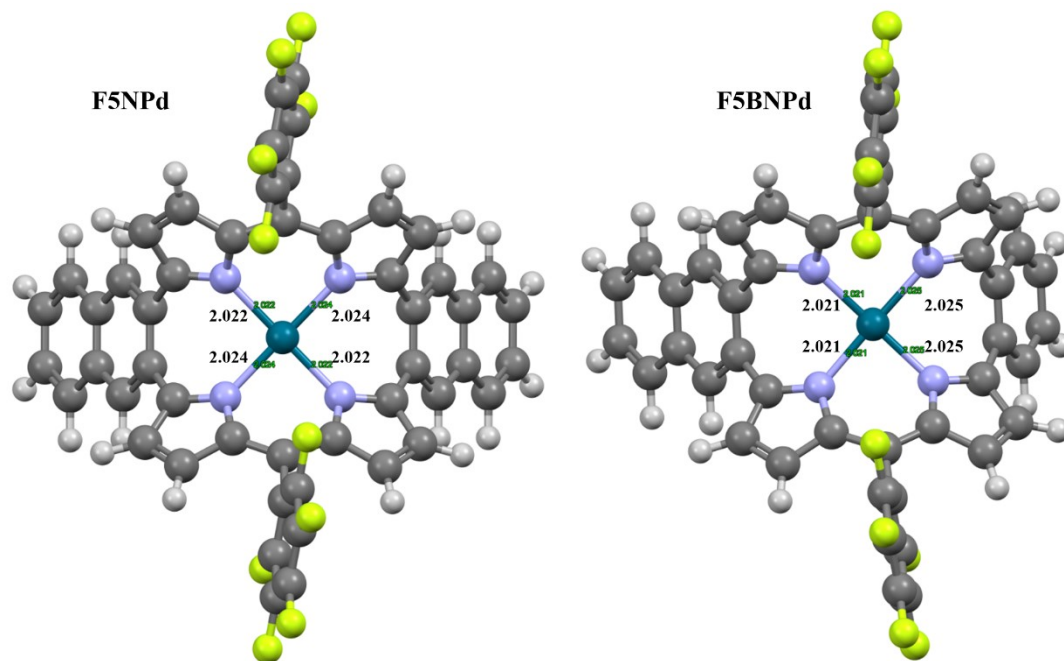

**Figure S7.** Optimized molecular structures and selected bond distances of **F5BNPd** and **F5NPd** calculated at the B3LYP/6-31G(d, p) (C, N, H, F) + SDD (Pd) basis set.



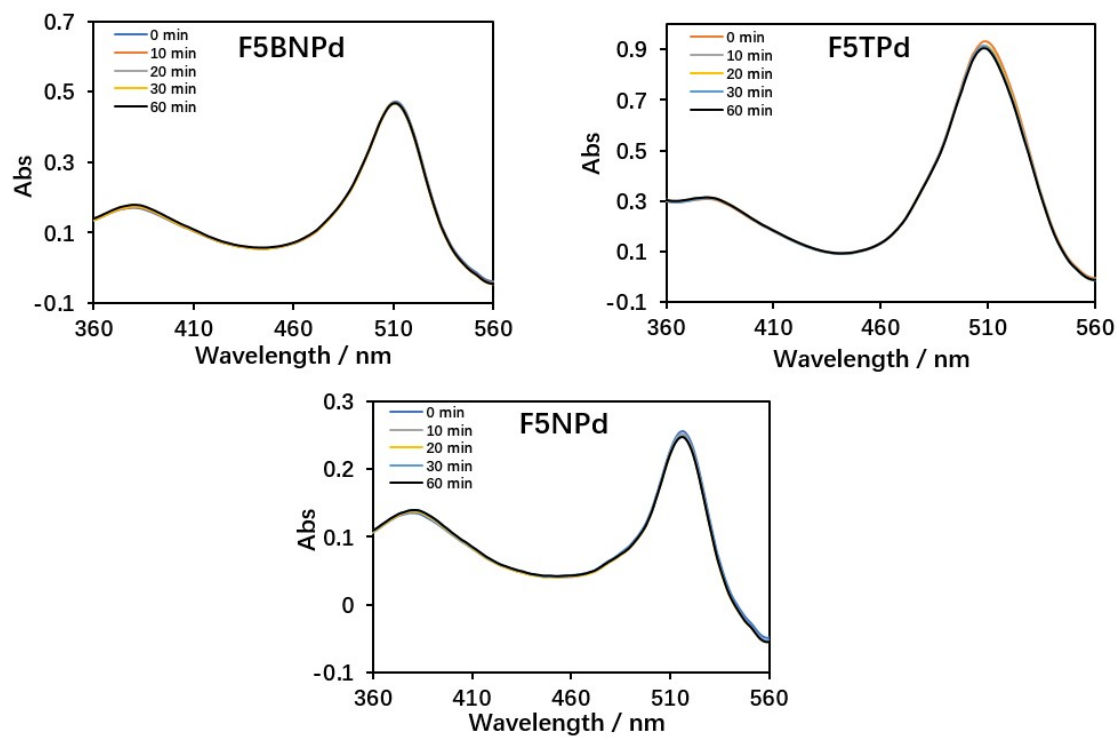

**Figure S8.** UV-vis absorption spectra of **F5BNPd**, **F5TPd**, and **F5NPd** under blue light for 1 hour.

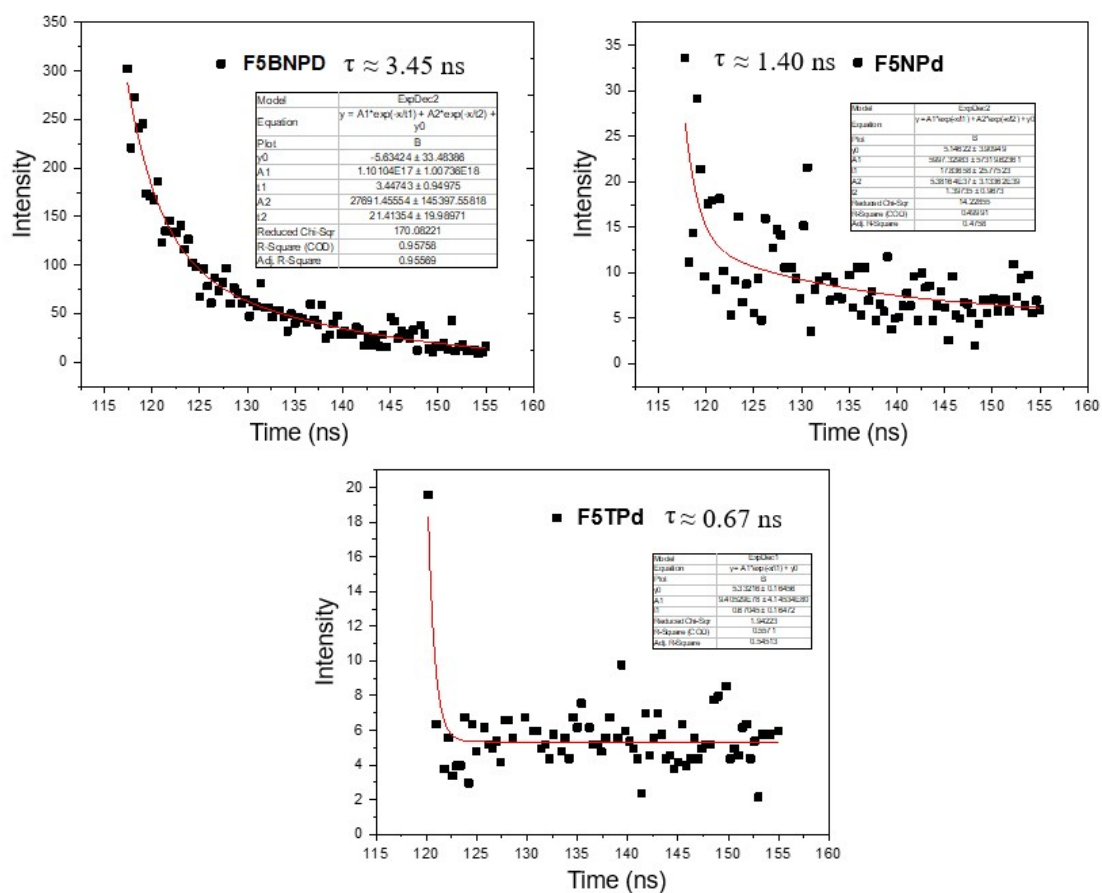

**Figure S9.** Phosphorescence decay profiles of F5BNPd, F5TPd, and F5NPd in air saturated toluene. The line (in red) is a least-squares fit assuming a single exponential.

## 2, Cartesian Coordinates

**F5BNPd** at ground state

Total energy: E = -3105.81926327 a.u.

|    |             |             |             |
|----|-------------|-------------|-------------|
| Pd | -0.00000200 | 0.54865300  | 0.66004600  |
| N  | -1.45399400 | -0.25149500 | 1.82033900  |
| N  | -1.44925200 | 1.06440500  | -0.65074500 |
| N  | 1.44922700  | 1.06444900  | -0.65076000 |
| N  | 1.45404600  | -0.25141500 | 1.82031800  |
| C  | -2.45853800 | -1.01017000 | 1.23867500  |
| C  | -2.88534000 | -0.84600300 | -0.08222300 |
| C  | -2.45896700 | 0.16468000  | -0.95034300 |
| C  | -1.52517800 | 2.06045500  | -1.54173800 |
| C  | -2.58168400 | 1.81662200  | -2.46315600 |
| C  | -3.14924400 | 0.61585900  | -2.10988200 |
| C  | -0.71422300 | 3.28260400  | -1.51742800 |
| C  | 0.71413200  | 3.28262800  | -1.51742900 |
| C  | 1.52513000  | 2.06050700  | -1.54174300 |
| C  | 2.45897500  | 0.16475700  | -0.95035500 |
| C  | 2.88536100  | -0.84593600 | -0.08225500 |
| C  | 2.45855500  | -1.01013700 | 1.23863800  |
| C  | 1.52121300  | -0.44853700 | 3.14190300  |
| C  | 2.56532000  | -1.36494700 | 3.45129200  |
| C  | 3.13054600  | -1.74242500 | 2.25738600  |
| C  | 0.70358700  | 0.24093800  | 4.14551600  |
| C  | -0.70354500 | 0.24086800  | 4.14554600  |
| C  | -1.52117200 | -0.44859500 | 3.14193300  |
| C  | -2.56532300 | -1.36495800 | 3.45132800  |
| C  | -3.13056700 | -1.74241800 | 2.25742900  |
| C  | -1.38211000 | 0.85353300  | 5.20842900  |
| C  | -0.69618400 | 1.47330800  | 6.24394400  |
| C  | 0.69621500  | 1.47339000  | 6.24390200  |
| C  | 1.38214700  | 0.85368000  | 5.20835200  |
| C  | 3.98141300  | -1.72828000 | -0.56871600 |
| C  | 3.14924800  | 0.61597000  | -2.10988400 |
| C  | 2.58165500  | 1.81671700  | -2.46315300 |
| C  | 1.38694600  | 4.48771300  | -1.58488400 |
| C  | 0.71254500  | 5.72796400  | -1.62820200 |
| C  | -0.71271900 | 5.72793900  | -1.62820200 |
| C  | -1.38707700 | 4.48766500  | -1.58488200 |
| C  | -3.98137900 | -1.72836900 | -0.56867000 |
| C  | -5.31015700 | -1.52082500 | -0.20441200 |
| C  | -6.32962500 | -2.34127800 | -0.67212500 |
| C  | -6.02401600 | -3.39415700 | -1.52657400 |
| C  | -4.70702400 | -3.62142200 | -1.90791000 |
| C  | -3.70255000 | -2.78842200 | -1.42930400 |
| C  | 3.70263200  | -2.78825200 | -1.42946600 |
| C  | 4.70713000  | -3.62122700 | -1.90806200 |
| C  | 6.02409700  | -3.39401800 | -1.52660300 |
| C  | 6.32966000  | -2.34121700 | -0.67204200 |

|   |             |             |             |
|---|-------------|-------------|-------------|
| C | 5.31016800  | -1.52078700 | -0.20433700 |
| F | -2.45120600 | -3.02858200 | -1.80653700 |
| F | -4.41786000 | -4.62884500 | -2.72358500 |
| F | -6.99032400 | -4.18234500 | -1.97790300 |
| F | -7.59027700 | -2.12352800 | -0.31307500 |
| F | -5.63206300 | -0.51583800 | 0.60486700  |
| F | 2.45131300  | -3.02836000 | -1.80681200 |
| F | 4.41801800  | -4.62857900 | -2.72384300 |
| F | 6.99042300  | -4.18218700 | -1.97792800 |
| F | 7.59028800  | -2.12351700 | -0.31287900 |
| F | 5.63203200  | -0.51587200 | 0.60504600  |
| C | -1.40153300 | 6.96544200  | -1.67428800 |
| C | -0.70712500 | 8.14932000  | -1.71768300 |
| C | 0.70686700  | 8.14934400  | -1.71768000 |
| C | 1.40131600  | 6.96549100  | -1.67428400 |
| H | -2.85233900 | 2.46837000  | -3.28243700 |
| H | -3.99098800 | 0.11937000  | -2.57244900 |
| H | 2.82671100  | -1.69472100 | 4.44741500  |
| H | 3.95532100  | -2.42417400 | 2.10360000  |
| H | -2.82671400 | -1.69473100 | 4.44745100  |
| H | -3.95537900 | -2.42412400 | 2.10364800  |
| H | -2.46826000 | 0.84502600  | 5.20318500  |
| H | -1.24685700 | 1.95287600  | 7.04768400  |
| H | 1.24688000  | 1.95302800  | 7.04760600  |
| H | 2.46829700  | 0.84527000  | 5.20305000  |
| H | 3.99100800  | 0.11950600  | -2.57245100 |
| H | 2.85230200  | 2.46848400  | -3.28242200 |
| H | 2.47396400  | 4.48268300  | -1.59299500 |
| H | -2.47409500 | 4.48259900  | -1.59299000 |
| H | -2.48851400 | 6.96140000  | -1.67286700 |
| H | -1.24308100 | 9.09336900  | -1.75132100 |
| H | 1.24279000  | 9.09341300  | -1.75131500 |
| H | 2.48829700  | 6.96148600  | -1.67286000 |

**F5NPd** at ground state

Total energy: E = -3259.28658319 a.u.

|    |             |             |             |
|----|-------------|-------------|-------------|
| Pd | 0.00000000  | 0.49270100  | 0.00000000  |
| N  | -1.46747400 | 0.32591800  | 1.38348800  |
| N  | -1.43404100 | 0.32963700  | -1.41598900 |
| N  | 1.46747300  | 0.32592400  | -1.38348900 |
| N  | 1.43404100  | 0.32963200  | 1.41598800  |
| C  | -2.46073700 | -0.62696500 | 1.21674600  |
| C  | -2.87537700 | -1.10001000 | -0.03149800 |
| C  | -2.44398700 | -0.60658100 | -1.26744300 |
| C  | -1.50131300 | 0.79351900  | -2.66981800 |
| C  | -2.55396300 | 0.14839300  | -3.37713500 |
| C  | -3.12643400 | -0.74916100 | -2.50800500 |
| C  | -0.67815200 | 1.87565600  | -3.21992000 |
| C  | 0.75029100  | 1.86192700  | -3.21021000 |
| C  | 1.54689600  | 0.76781800  | -2.64392300 |
| C  | 2.46073700  | -0.62695900 | -1.21675200 |
| C  | 2.87537700  | -1.10000800 | 0.03149100  |
| C  | 2.44398800  | -0.60658500 | 1.26743800  |
| C  | 1.50131300  | 0.79350900  | 2.66981900  |
| C  | 2.55396400  | 0.14838100  | 3.37713300  |
| C  | 3.12643500  | -0.74917000 | 2.50799900  |
| C  | 0.67815100  | 1.87564400  | 3.21992600  |
| C  | -0.75029300 | 1.86191400  | 3.21021500  |
| C  | -1.54689700 | 0.76780700  | 2.64392300  |
| C  | -2.58643800 | 0.08848200  | 3.33928700  |
| C  | -3.13768000 | -0.80765900 | 2.45568500  |
| C  | -1.43747300 | 2.88193800  | 3.83997600  |
| C  | -0.77778200 | 3.95830100  | 4.47341700  |
| C  | 0.64737500  | 3.97278100  | 4.48211600  |
| C  | 1.33652500  | 2.90983300  | 3.85764400  |
| C  | 3.95993100  | -2.11936500 | 0.05931500  |
| C  | 3.13767700  | -0.80764900 | -2.45569200 |
| C  | 2.58643400  | 0.08849500  | -3.33928900 |
| C  | 1.43747100  | 2.88195300  | -3.83996600 |
| C  | 0.77778000  | 3.95831800  | -4.47340200 |
| C  | -0.64737700 | 3.97279800  | -4.48210000 |
| C  | -1.33652600 | 2.90984700  | -3.85763400 |
| C  | -3.95993000 | -2.11936600 | -0.05932500 |
| C  | -5.29384700 | -1.78459500 | 0.16410200  |
| C  | -6.30089800 | -2.74162400 | 0.12455200  |
| C  | -5.97703500 | -4.06569000 | -0.14705500 |
| C  | -4.65460300 | -4.42605100 | -0.37683200 |
| C  | -3.66295300 | -3.45312800 | -0.33367300 |
| C  | 3.66295600  | -3.45312600 | 0.33366700  |
| C  | 4.65460600  | -4.42604800 | 0.37682600  |
| C  | 5.97703700  | -4.06568700 | 0.14704600  |
| C  | 6.30089900  | -2.74162200 | -0.12456500 |
| C  | 5.29384700  | -1.78459300 | -0.16411500 |
| F  | -2.40599800 | -3.82419300 | -0.55337300 |

|   |             |             |             |
|---|-------------|-------------|-------------|
| F | -4.34838000 | -5.69249500 | -0.63420300 |
| F | -6.93101800 | -4.98597100 | -0.18654000 |
| F | -7.56693900 | -2.39948900 | 0.33852600  |
| F | -5.63322000 | -0.52377500 | 0.41645100  |
| F | 2.40600100  | -3.82419100 | 0.55337000  |
| F | 4.34838400  | -5.69249200 | 0.63420000  |
| F | 6.93102100  | -4.98596700 | 0.18653100  |
| F | 7.56694000  | -2.39948700 | -0.33854100 |
| F | 5.63322000  | -0.52377400 | -0.41646600 |
| C | 1.32129600  | 5.04547300  | 5.11730400  |
| C | 0.61285100  | 6.05792200  | 5.71612500  |
| C | -0.80101200 | 6.04349000  | 5.70750500  |
| C | -1.48122600 | 5.01682600  | 5.10016000  |
| C | -1.32129800 | 5.04549300  | -5.11728400 |
| C | -0.61285300 | 6.05794400  | -5.71610100 |
| C | 0.80101000  | 6.04351200  | -5.70748200 |
| C | 1.48122400  | 5.01684500  | -5.10014100 |
| H | -2.81747900 | 0.34121200  | -4.40800100 |
| H | -3.96661500 | -1.40462800 | -2.69145600 |
| H | 2.81748100  | 0.34119600  | 4.40800000  |
| H | 3.96661600  | -1.40463800 | 2.69144700  |
| H | -2.85450000 | 0.25807800  | 4.37305100  |
| H | -3.95626500 | -1.49126300 | 2.63281600  |
| H | -2.52439600 | 2.86213500  | 3.83852800  |
| H | 2.42353500  | 2.91195000  | 3.87016200  |
| H | 3.95626100  | -1.49125300 | -2.63282700 |
| H | 2.85449500  | 0.25809400  | -4.37305300 |
| H | 2.52439400  | 2.86215000  | -3.83851900 |
| H | -2.42353600 | 2.91196500  | -3.87015200 |
| H | 2.40825100  | 5.05387800  | 5.12075600  |
| H | 1.13757400  | 6.87688600  | 6.19943600  |
| H | -1.34820500 | 6.85148200  | 6.18430800  |
| H | -2.56807800 | 5.00290100  | 5.09031300  |
| H | -2.40825300 | 5.05389800  | -5.12073600 |
| H | -1.13757700 | 6.87691000  | -6.19940900 |
| H | 1.34820200  | 6.85150600  | -6.18428200 |
| H | 2.56807600  | 5.00292100  | -5.09029400 |
